# Supplementary material
Source: Research Square preprint supplement (doi:10.21203/rs.3.rs-9958523/v1)
Supplement: Supplementary file 1 [file dbe73c6af7fe1281e006e6dd.docx]

Supplementary materials

**DFT-based conformational analysis of negatively-charged cytosine-containing artificial Threose Nucleic Acid (TNA) nucleotides**

**Justyna Konieczna, Andrzej Nowacki***

*Faculty of Chemistry, Department of Organic Chemistry, University of Gdańsk, Wita Stwosza 63, PL-80-308 Gdańsk, Poland*

Table S1. XYZ geometries of conformers optimized at M062X/6-31+G** level of theory.

| Geometry no | XYZ |
| --- | --- |
| 1 | C 1.436071 1.945212 -1.104646  O 0.082667 1.777533 -1.563353  C -0.801870 1.809540 -0.483880  C 0.029976 2.094321 0.783765  C 1.404646 1.568972 0.373867  H 2.084090 1.301314 -1.701149  H 1.728314 2.995625 -1.221617  H -1.566991 2.576438 -0.632167  H -0.360746 1.559183 1.653793  H 2.226102 2.025602 0.935448  C -1.026100 -0.614342 -0.913337  C -2.695274 0.545128 0.405166  C -1.707773 -1.784650 -0.758864  H -0.068786 -0.559136 -1.428282  C -2.922007 -1.721308 -0.021023  H -1.315455 -2.705675 -1.169721  N -1.523920 0.525945 -0.383633  N -3.395957 -0.620665 0.527919  N -3.686989 -2.854708 0.121968  H -4.394935 -2.795693 0.839565  H -3.224062 -3.744219 0.020463  O -3.019765 1.604029 0.942719  O 0.109762 3.488283 1.013368  H -0.774809 3.786053 1.258538  O 1.343868 0.174740 0.579340  P 2.539970 -0.784146 -0.108885  O 3.812801 -0.009344 -0.108352  O 1.925218 -1.378213 -1.345745  O 2.598213 -1.922778 1.065802  C 1.465286 -2.760754 1.195980  H 1.251645 -3.272635 0.250853  H 1.693839 -3.493795 1.974638  H 0.582349 -2.179752 1.492903 |
| 2 | C -1.413912 1.701740 1.115283  O -0.140281 1.348713 1.685965  C 0.879211 1.594180 0.761072  C 0.217755 2.123246 -0.530592  C -1.206887 1.590364 -0.388008  H -2.165347 1.011112 1.495243  H -1.659630 2.735700 1.386562  H 1.599923 2.315418 1.155061  H 0.705002 1.726063 -1.425852  H -1.941144 2.167037 -0.957293  C 1.088225 -0.866504 0.693290  C 2.898930 0.530453 -0.102819  C 1.799934 -1.983881 0.378556  H 0.073488 -0.891625 1.079581  C 3.099454 -1.776600 -0.164448  H 1.372257 -2.969041 0.507047  N 1.635764 0.355336 0.503855  N 3.627575 -0.589802 -0.383619  N 3.886930 -2.863335 -0.462311  H 4.678068 -2.653090 -1.053884  H 3.417567 -3.736853 -0.644052  O 3.272214 1.676211 -0.352781  O 0.192274 3.537640 -0.526861  H 1.106446 3.835294 -0.612877  O -1.144270 0.244792 -0.823721  P -2.489714 -0.713092 -0.668177  O -2.403734 -1.817170 -1.664375  O -3.681369 0.175897 -0.485055  O -2.067327 -1.329647 0.831510  C -2.940963 -2.328337 1.319076  H -2.981294 -3.177399 0.626079  H -2.555353 -2.662805 2.286852  H -3.953626 -1.926733 1.453616 |
| 3 | C 0.758259 -1.792512 1.243287  O -0.638183 -1.489681 1.266182  C -0.979140 -1.059528 -0.039822  C 0.194637 -0.181681 -0.476494  C 1.404164 -0.866783 0.199444  H 1.164003 -1.605207 2.238911  H 0.892741 -2.850332 0.979239  H -1.121958 -1.895162 -0.732408  H 0.106565 0.813404 -0.012055  H 1.963735 -1.435736 -0.555315  C -2.367422 0.682718 0.890935  C -3.390789 -0.877983 -0.656576  C -3.536594 1.355777 1.038354  H -1.468966 0.933331 1.445351  C -4.627695 0.883671 0.240581  H -3.629403 2.191679 1.718499  N -2.259148 -0.369903 0.047031  N -4.558493 -0.157773 -0.549644  N -5.838435 1.522935 0.325541  H -6.501785 1.271895 -0.393253  H -5.850956 2.479529 0.641174  O -3.289361 -1.894995 -1.317130  O 0.251619 -0.088752 -1.865058  H 1.059973 0.450588 -2.025625  O 2.259289 0.051257 0.850697  P 3.265972 0.942138 -0.139189  O 3.953936 1.927543 0.737549  O 2.491325 1.284527 -1.381095  O 4.317247 -0.246379 -0.590629  C 5.234242 -0.676940 0.397092  H 4.709635 -1.144376 1.241484  H 5.892625 -1.414492 -0.070714  H 5.821985 0.165546 0.775121 |
| 4 | C 0.510797 -1.453306 1.677587  O -0.716454 -2.017339 1.218675  C -0.956852 -1.553207 -0.099156  C 0.384165 -1.057219 -0.663808  C 1.391709 -1.454688 0.434467  H 0.383341 -0.424347 2.044448  H 0.885779 -2.081251 2.488378  H -1.382944 -2.364389 -0.685832  H 0.350464 0.026892 -0.761452  H 1.719169 -2.478694 0.211767  C -1.674267 0.764200 0.354044  C -3.335503 -0.879463 -0.301877  C -2.640407 1.707931 0.505825  H -0.626618 1.004959 0.542965  C -3.973444 1.304402 0.194532  H -2.391399 2.708963 0.832016  N -1.982376 -0.492635 -0.066750  N -4.299132 0.094760 -0.191272  N -4.996624 2.210339 0.329632  H -5.867596 1.932187 -0.098622  H -4.767145 3.190732 0.296304  O -3.590244 -2.033372 -0.605985  O 0.672734 -1.605013 -1.925273  H 1.388195 -1.030745 -2.259907  O 2.542604 -0.652191 0.578367  P 2.542134 0.836318 -0.171714  O 1.483857 1.687007 0.462806  O 2.558366 0.569638 -1.655577  O 4.006150 1.333899 0.331371  C 5.133593 0.685728 -0.235018  H 5.078431 0.699686 -1.327895  H 6.018538 1.230642 0.103608  H 5.191629 -0.353703 0.109198 |
| 5 | C -1.385764 1.624981 1.087906  O -0.061494 1.505784 1.637126  C 0.897797 1.678934 0.638294  C 0.148699 2.043085 -0.658529  C -1.223993 1.415034 -0.414689  H -2.016753 0.875257 1.565200  H -1.758184 2.639584 1.275649  H 1.608490 2.462610 0.914694  H 0.629432 1.614215 -1.541964  H -2.015284 1.914635 -0.983258  C 1.217635 -0.759828 0.877077  C 2.899965 0.585425 -0.233411  C 1.956743 -1.881534 0.654520  H 0.237119 -0.781470 1.350691  C 3.197993 -1.701818 -0.016998  H 1.585845 -2.853175 0.951578  N 1.687147 0.443868 0.474768  N 3.653945 -0.535572 -0.428698  N 4.009525 -2.789805 -0.237788  H 4.738745 -2.631493 -0.918410  H 3.565036 -3.694323 -0.267546  O 3.209899 1.705519 -0.641513  O 0.005165 3.447632 -0.763001  H 0.885638 3.809643 -0.921552  O -1.096759 0.065201 -0.816969  P -2.112424 -1.128143 -0.282266  O -1.829917 -1.390010 1.173569  O -2.121390 -2.214744 -1.299340  O -3.502623 -0.222990 -0.368435  C -4.654818 -0.857360 0.149110  H -4.509685 -1.122566 1.203747  H -5.486959 -0.153455 0.058137  H -4.887301 -1.766327 -0.419857 |
| 6 | C 1.462387 1.856632 -1.477571  O 0.202272 1.222500 -1.693736  C -0.593318 1.507026 -0.580810  C 0.340663 1.678892 0.644215  C 1.752061 1.697608 0.020541  H 2.195633 1.349771 -2.105717  H 1.379867 2.923731 -1.735076  H -1.151473 2.444397 -0.720338  H 0.242046 0.830798 1.327624  H 2.293620 2.562278 0.415429  C -1.476877 -0.737101 -1.075354  C -2.594790 0.690760 0.520532  C -2.431933 -1.695021 -0.896795  H -0.606413 -0.847988 -1.710455  C -3.470704 -1.389113 0.019625  H -2.363101 -2.650321 -1.398844  N -1.588165 0.443765 -0.431273  N -3.557437 -0.256152 0.690635  N -4.486519 -2.296712 0.224140  H -5.034523 -2.116745 1.053491  H -4.275821 -3.265288 0.039573  O -2.554433 1.752336 1.151618  O 0.089853 2.916386 1.281924  H -0.846950 2.880426 1.536062  O 2.538065 0.568901 0.328663  P 2.125993 -0.946953 -0.243712  O 2.444865 -1.045413 -1.697878  O 0.760543 -1.271064 0.302117  O 3.263704 -1.764362 0.600508  C 3.086293 -1.837587 2.003085  H 2.093514 -2.230008 2.247983  H 3.859071 -2.506709 2.392050  H 3.200824 -0.846284 2.458547 |
| 7 | C -0.582782 1.954457 -0.204424  O 0.598335 1.784205 -1.000373  C 0.922139 0.422502 -1.043590  C -0.156735 -0.366800 -0.294151  C -1.327087 0.628908 -0.336081  H -0.309775 2.130633 0.841223  H -1.133818 2.806727 -0.608202  H 0.922964 0.079796 -2.085466  H 0.123018 -0.502765 0.760662  H -1.818621 0.552925 -1.319273  C 3.144685 -0.522435 -1.345221  C 2.683583 0.617037 0.736423  C 4.412044 -0.812936 -0.948457  H 2.745811 -0.845056 -2.301913  C 4.783084 -0.320493 0.342413  H 5.091132 -1.370451 -1.579156  N 2.296682 0.180657 -0.565690  N 3.977623 0.352212 1.124461  N 6.066225 -0.520688 0.790426  H 6.199839 -0.335989 1.774423  H 6.585823 -1.293146 0.404975  O 1.873852 1.187812 1.440578  O -0.342516 -1.584010 -0.956461  H -1.212284 -1.932365 -0.612846  O -2.268409 0.501476 0.700694  P -3.392110 -0.719233 0.570530  O -4.270955 -0.621859 1.765486  O -2.669588 -1.968155 0.140415  O -4.200122 -0.201097 -0.772664  C -5.026844 0.933940 -0.600185  H -4.431275 1.814302 -0.322881  H -5.523669 1.121486 -1.556545  H -5.772177 0.757309 0.182011 |
| 8 | C -0.589857 2.456126 1.544746  O 0.700501 1.859489 1.526639  C 1.081032 1.668905 0.172185  C -0.216355 1.675014 -0.665929  C -1.337868 1.830390 0.379999  H -1.052980 2.237310 2.508693  H -0.508075 3.543831 1.401144  H 1.755368 2.459524 -0.164252  H -0.334336 0.745083 -1.231065  H -2.138406 2.464602 -0.014202  C 1.166745 -0.754744 0.276286  C 3.240016 0.467792 -0.070845  C 1.834065 -1.936258 0.253871  H 0.088368 -0.710550 0.419371  C 3.241459 -1.858699 0.032698  H 1.304017 -2.871347 0.374999  N 1.826562 0.419907 0.091021  N 3.901711 -0.734424 -0.120434  N 3.979159 -3.017189 0.005618  H 4.912488 -2.914474 -0.365708  H 3.497290 -3.874754 -0.213013  O 3.803696 1.546477 -0.174669  O -0.179043 2.778926 -1.549977  H -0.967480 2.689975 -2.103588  O -1.846648 0.576304 0.781606  P -2.594107 -0.311419 -0.413082  O -1.788035 -1.559656 -0.623324  O -2.907474 0.633048 -1.537004  O -3.945671 -0.684945 0.440798  C -4.582536 -1.901741 0.101113  H -3.875916 -2.736362 0.154979  H -5.394388 -2.049867 0.818347  H -5.005135 -1.858223 -0.911188 |
| 9 | C -0.962511 0.854019 1.404398  O 0.332249 1.455396 1.493039  C 0.911386 1.493934 0.200841  C -0.241782 1.392709 -0.809996  C -1.494117 1.413723 0.079095  H -0.902190 -0.238585 1.396154  H -1.539717 1.174442 2.274256  H 1.454361 2.431011 0.091051  H -0.222609 0.452444 -1.368596  H -1.752755 2.469093 0.237882  C 1.529272 -0.866930 -0.071696  C 3.287268 0.782443 0.233738  C 2.448322 -1.868550 -0.090845  H 0.460929 -1.070925 -0.182673  C 3.815119 -1.475731 0.023486  H 2.140912 -2.900504 -0.196092  N 1.916244 0.430101 0.058495  N 4.209927 -0.232832 0.166601  N 4.793147 -2.439089 0.014932  H 5.732528 -2.090769 -0.108718  H 4.577916 -3.330662 -0.401578  O 3.594724 1.950064 0.414277  O -0.170539 2.494673 -1.700784  H -0.911166 2.407607 -2.313025  O -2.623177 0.815413 -0.508832  P -2.783988 -0.847461 -0.559666  O -1.412369 -1.442863 -0.692526  O -3.928723 -1.116765 -1.470486  O -3.232496 -1.118530 1.005843  C -4.544685 -0.718470 1.356911  H -5.283669 -1.209359 0.715663  H -4.702873 -1.004302 2.400601  H -4.660351 0.368947 1.256338 |
| 10 | C 1.426727 1.687263 -1.624438  O -0.001131 1.719547 -1.730758  C -0.611689 1.676620 -0.478832  C 0.458155 1.484176 0.615026  C 1.801743 1.543237 -0.135252  H 1.802384 0.834796 -2.192304  H 1.807228 2.623829 -2.048229  H -1.159756 2.606971 -0.289837  H 0.336391 0.509821 1.097194  H 2.325239 2.437577 0.217321  C -1.666871 -0.382724 -1.365560  C -2.496686 0.633745 0.658150  C -2.628822 -1.347107 -1.286711  H -0.891006 -0.350467 -2.118459  C -3.528611 -1.253250 -0.192285  H -2.671550 -2.154536 -2.004922  N -1.630734 0.606742 -0.451784  N -3.476868 -0.309816 0.727373  N -4.549409 -2.169811 -0.072715  H -4.979429 -2.187131 0.841217  H -4.406434 -3.069520 -0.504852  O -2.325553 1.509012 1.512149  O 0.390385 2.530611 1.564872  H -0.494509 2.454030 1.956667  O 2.689867 0.472795 0.103426  P 2.178519 -1.103331 -0.102822  O 3.391941 -1.902523 -0.431804  O 0.922669 -1.053019 -0.923561  O 1.688398 -1.449136 1.432807  C 2.708953 -1.592355 2.403106  H 3.221379 -0.636151 2.570730  H 2.230196 -1.912541 3.332687  H 3.444446 -2.337477 2.082671 |
| 11 | C 0.820000 -2.413431 1.465613  O -0.536769 -2.000298 1.354122  C -0.802832 -1.682161 -0.002645  C 0.553277 -1.367942 -0.668993  C 1.592322 -1.593276 0.446249  H 1.149104 -2.228682 2.489934  H 0.906228 -3.484212 1.229647  H -1.318152 -2.496059 -0.517351  H 0.587365 -0.327344 -1.001726  H 2.453933 -2.133574 0.043785  C -1.257614 0.633629 0.512452  C -3.066460 -0.710375 -0.395639  C -2.071319 1.716864 0.600402  H -0.215618 0.658767 0.825650  C -3.409440 1.532951 0.133990  H -1.711724 2.656215 0.998805  N -1.712210 -0.539635 0.002519  N -3.874787 0.400046 -0.335400  N -4.290385 2.583268 0.204029  H -5.145252 2.457535 -0.317960  H -3.913750 3.516715 0.243939  O -3.454589 -1.800467 -0.782828  O 0.768005 -2.227687 -1.766970  H 1.594397 -1.900985 -2.158581  O 2.004751 -0.366932 1.022073  P 2.865258 0.629625 0.003058  O 3.091212 -0.135199 -1.274350  O 3.946692 1.322077 0.755439  O 1.615948 1.703827 -0.244242  C 1.982464 2.919064 -0.867721  H 2.397254 2.737299 -1.867651  H 1.075828 3.524081 -0.962333  H 2.725137 3.452004 -0.263303 |
| 12 | C -1.044789 2.210628 1.659048  O 0.369788 2.020579 1.820144  C 0.970576 1.856391 0.557118  C -0.150645 1.952993 -0.495333  C -1.377442 1.550046 0.332607  H -1.549802 1.725066 2.497326  H -1.270321 3.283569 1.640006  H 1.731592 2.622492 0.395022  H 0.026122 1.277577 -1.336065  H -2.309837 1.893045 -0.129880  C 1.318525 -0.483061 1.274781  C 2.477448 0.387817 -0.660653  C 1.820890 -1.721172 1.037082  H 0.635341 -0.251394 2.081260  C 2.624050 -1.855824 -0.132575  H 1.543551 -2.568844 1.648481  N 1.644666 0.552025 0.470775  N 2.987984 -0.853888 -0.897725  N 3.098421 -3.105351 -0.476613  H 3.403580 -3.141905 -1.440533  H 2.496301 -3.872085 -0.212032  O 2.695492 1.372033 -1.366208  O -0.315281 3.298971 -0.909044  H 0.385776 3.482464 -1.545542  O -1.389615 0.160795 0.572787  P -1.593368 -0.874960 -0.739982  O -0.251331 -1.142582 -1.336085  O -2.771975 -0.364247 -1.508739  O -2.012334 -2.189424 0.150696  C -3.298013 -2.168215 0.740320  H -4.070661 -1.995082 -0.016026  H -3.452268 -3.140620 1.217462  H -3.362769 -1.377989 1.499619 |
| 13 | C -1.306673 1.670843 1.146952  O 0.038823 1.685619 1.678339  C 0.985013 1.763671 0.644401  C 0.200597 2.232844 -0.590550  C -1.162859 1.567496 -0.373279  H -1.855832 0.825943 1.565244  H -1.804668 2.603576 1.442554  H 1.773408 2.472989 0.901272  H 0.674800 1.944105 -1.528202  H -1.967674 2.093043 -0.894182  C 1.052330 -0.702484 0.792884  C 2.898012 0.489300 -0.224950  C 1.658974 -1.892575 0.538352  H 0.078909 -0.640134 1.263120  C 2.919584 -1.829694 -0.120704  H 1.175666 -2.825884 0.793199  N 1.647733 0.459792 0.442017  N 3.514247 -0.708717 -0.465912  N 3.595851 -2.996356 -0.391535  H 4.349370 -2.889762 -1.055855  H 3.041491 -3.833310 -0.486999  O 3.360032 1.575557 -0.555391  O 0.089913 3.645832 -0.582505  H -0.281974 3.921988 0.264340  O -1.061076 0.228911 -0.815132  P -2.407316 -0.735492 -0.668813  O -2.361271 -1.794964 -1.713479  O -3.582122 0.158879 -0.412492  O -1.957297 -1.422911 0.791770  C -2.802426 -2.471352 1.224334  H -2.827008 -3.276264 0.480206  H -2.400504 -2.853812 2.167308  H -3.823677 -2.104552 1.389807 |
| 14 | C 0.955620 2.496310 -1.720560  O -0.465684 2.390617 -1.516567  C -0.728497 2.020175 -0.186238  C 0.630991 1.951113 0.535787  C 1.569663 1.633026 -0.632074  H 1.184715 2.121188 -2.720365  H 1.258049 3.544860 -1.618813  H -1.395542 2.743267 0.287377  H 0.653272 1.179259 1.305970  H 2.613166 1.858699 -0.392459  C -1.329592 -0.171923 -1.158708  C -1.909295 0.342575 1.129155  C -1.787366 -1.442582 -1.008177  H -0.872498 0.197280 -2.066848  C -2.283028 -1.779675 0.282785  H -1.696233 -2.169031 -1.803770  N -1.407715 0.710867 -0.140135  N -2.379726 -0.930747 1.282071  N -2.724488 -3.064071 0.516374  H -2.812388 -3.282255 1.499631  H -2.292075 -3.785816 -0.041667  O -1.892895 1.181902 2.027669  O 0.970618 3.230937 1.044028  H 0.499215 3.337855 1.878121  O 1.402462 0.294750 -1.052245  P 2.028933 -0.961107 -0.159482  O 3.248540 -0.463468 0.549209  O 1.981926 -2.178445 -1.022167  O 0.770712 -1.054838 0.931103  C 0.679021 -2.260013 1.661753  H 1.594740 -2.442999 2.239410  H -0.169221 -2.157669 2.345196  H 0.514209 -3.106893 0.982106 |
| 15 | C -0.427433 -1.443837 1.551010  O 0.714020 -0.689368 1.985671  C 0.936151 0.356021 1.080396  C -0.183728 0.349833 0.034095  C -1.273694 -0.436172 0.780595  H -0.110515 -2.254818 0.887059  H -0.921700 -1.840198 2.439757  H 0.894641 1.315175 1.610548  H 0.108485 -0.245523 -0.843062  H -1.797316 0.242952 1.470329  C 3.100682 1.375154 0.616029  C 2.731809 -0.882966 -0.162637  C 4.358224 1.387560 0.099103  H 2.673243 2.231858 1.127833  C 4.771702 0.180589 -0.547896  H 5.001347 2.252527 0.188616  N 2.299221 0.294153 0.517806  N 4.013399 -0.879455 -0.664749  N 6.048083 0.094381 -1.048879  H 6.203642 -0.690578 -1.665312  H 6.520334 0.951766 -1.287981  O 1.967965 -1.821367 -0.276890  O -0.481955 1.674794 -0.297477  H -1.365362 1.625060 -0.764891  O -2.196448 -1.113158 -0.039054  P -3.394014 -0.231154 -0.743899  O -4.228971 -1.129880 -1.581216  O -2.793447 1.048395 -1.291061  O -4.183658 0.175832 0.654529  C -5.174163 1.173820 0.516498  H -5.976110 0.838712 -0.154077  H -5.593609 1.359367 1.509400  H -4.739882 2.099226 0.119627 |
| 16 | C 0.501291 0.697998 1.926094  O -0.740187 0.003203 2.119834  C -1.034687 -0.730524 0.963371  C 0.119348 -0.564280 -0.028281  C 1.259446 -0.160284 0.919530  H 0.311571 1.692457 1.508059  H 0.995028 0.772246 2.896799  H -1.114141 -1.795528 1.213703  H -0.064904 0.288783 -0.697102  H 1.660885 -1.062402 1.409121  C -3.258166 -1.347944 0.188350  C -2.645490 0.987796 0.088985  C -4.483076 -1.087699 -0.340931  H -2.935339 -2.352640 0.442994  C -4.753026 0.287751 -0.624842  H -5.203496 -1.874187 -0.520363  N -2.359911 -0.369180 0.423650  N -3.897094 1.256098 -0.417794  N -5.989950 0.639837 -1.108853  H -6.041585 1.578085 -1.479556  H -6.523439 -0.063130 -1.595246  O -1.791638 1.837467 0.253641  O 0.276466 -1.763655 -0.729996  H 1.158718 -1.687366 -1.185963  O 2.288662 0.573739 0.308423  P 3.426305 -0.344854 -0.501657  O 2.694992 -1.134194 -1.555653  O 4.322585 -0.988147 0.505789  O 4.189542 0.888054 -1.248473  C 5.008201 1.711418 -0.436874  H 5.729085 1.108125 0.124309  H 5.532912 2.399602 -1.105054  H 4.397208 2.287732 0.268723 |
| 17 | C -0.952926 2.238192 1.668380  O 0.470562 2.058782 1.714759  C 0.955560 1.857142 0.407751  C -0.265545 1.806378 -0.534585  C -1.387980 1.450151 0.445007  H -1.373714 1.834491 2.591050  H -1.189258 3.304032 1.563427  H 1.635696 2.661670 0.121104  H -0.173580 1.050397 -1.318320  H -2.377957 1.716556 0.059673  C 1.490223 -0.433782 1.167611  C 2.617702 0.504703 -0.758325  C 2.144218 -1.612448 0.995087  H 0.738667 -0.269029 1.928357  C 3.055303 -1.673260 -0.097604  H 1.922270 -2.468496 1.616840  N 1.736740 0.611420 0.344326  N 3.302977 -0.667578 -0.908893  N 3.758752 -2.835195 -0.320516  H 4.174035 -2.883604 -1.240710  H 3.323855 -3.687667 -0.000418  O 2.717938 1.462043 -1.522457  O -0.525825 3.099571 -1.057607  H 0.106685 3.247500 -1.770558  O -1.300117 0.091151 0.813826  P -1.890815 -1.095971 -0.183805  O -1.510139 -2.389538 0.452792  O -1.582344 -0.746914 -1.609229  O -3.494969 -0.759326 0.080309  C -4.387831 -1.314950 -0.862943  H -4.352402 -2.412423 -0.839726  H -5.396299 -0.988251 -0.591830  H -4.144634 -0.973397 -1.875668 |
| 18 | C -0.950245 0.858581 1.374150  O 0.327811 1.490679 1.472341  C 0.913637 1.506632 0.183084  C -0.247337 1.449968 -0.840860  C -1.500700 1.422536 0.057024  H -0.862295 -0.231835 1.347599  H -1.537127 1.147260 2.248402  H 1.486774 2.427196 0.083911  H -0.227514 0.548522 -1.454569  H -1.783782 2.470562 0.247495  C 1.499841 -0.859024 -0.147443  C 3.268625 0.752603 0.279358  C 2.406832 -1.871891 -0.166832  H 0.433007 -1.045396 -0.301422  C 3.772342 -1.504403 0.017434  H 2.089517 -2.894756 -0.320422  N 1.898956 0.426397 0.045474  N 4.178556 -0.272177 0.217658  N 4.736376 -2.480564 0.018817  H 5.685747 -2.145063 -0.050987  H 4.525919 -3.359745 -0.425194  O 3.583958 1.911493 0.504019  O -0.209523 2.534820 -1.747447  H -0.435973 3.342874 -1.271631  O -2.633455 0.817100 -0.501719  P -2.773267 -0.845116 -0.571938  O -1.399333 -1.414664 -0.775220  O -3.957632 -1.124900 -1.425490  O -3.140488 -1.148256 1.011174  C -4.441832 -0.782973 1.431826  H -5.201352 -1.284949 0.824116  H -4.540109 -1.081928 2.479299  H -4.588679 0.302434 1.348754 |
| 19 | C -1.010398 1.693489 1.445345  O 0.409097 1.751254 1.705414  C 1.130211 1.790373 0.507022  C 0.103822 1.997737 -0.612788  C -1.133765 1.310327 -0.026084  H -1.474108 0.945931 2.090073  H -1.439014 2.684220 1.632368  H 1.867797 2.594547 0.515042  H 0.432048 1.550347 -1.555229  H -2.070419 1.663861 -0.476413  C 1.495439 -0.615547 0.949204  C 2.915581 0.536696 -0.633893  C 2.136578 -1.787774 0.702269  H 0.666044 -0.528321 1.638121  C 3.183418 -1.738926 -0.261898  H 1.819222 -2.707063 1.174590  N 1.873357 0.522767 0.323774  N 3.565957 -0.642481 -0.879377  N 3.875399 -2.889863 -0.558733  H 4.424652 -2.832232 -1.404580  H 3.391745 -3.761994 -0.407916  O 3.176648 1.592550 -1.200569  O -0.092339 3.398451 -0.718805  H -0.728800 3.560242 -1.423258  O -0.960536 -0.074721 -0.222840  P -2.267116 -1.068374 0.028089  O -3.060465 -0.536492 1.187156  O -1.764577 -2.468236 -0.053549  O -3.068976 -0.644068 -1.361671  C -4.427413 -1.029148 -1.411812  H -4.981666 -0.607625 -0.564997  H -4.841072 -0.650508 -2.351210  H -4.527506 -2.122483 -1.394457 |
| 20 | C 0.551070 -2.089288 0.814338  O -0.674055 -2.211435 0.073172  C -0.859396 -1.055147 -0.692350  C 0.347082 -0.136792 -0.487798  C 1.409741 -1.143649 -0.021033  H 0.350919 -1.652913 1.798714  H 0.978813 -3.088299 0.914706  H -0.900942 -1.319161 -1.756469  H 0.165186 0.568924 0.333936  H 1.829561 -1.653585 -0.899820  C -3.034810 -0.233564 -1.419360  C -2.476519 -0.017899 0.923052  C -4.247040 0.348459 -1.222123  H -2.700435 -0.564837 -2.397456  C -4.537596 0.728944 0.126246  H -4.945897 0.496278 -2.034198  N -2.164383 -0.430485 -0.406741  N -3.711226 0.554653 1.126545  N -5.762201 1.276635 0.415562  H -5.831634 1.699726 1.329884  H -6.275135 1.720412 -0.329161  O -1.654383 -0.176080 1.804695  O 0.587038 0.526882 -1.703988  H 1.445548 0.981784 -1.602315  O 2.436559 -0.593807 0.761974  P 3.701022 0.144874 -0.043138  O 3.972401 -0.617971 -1.295280  O 4.687275 0.534364 1.000947  O 2.887916 1.525071 -0.545052  C 2.589606 2.473106 0.467483  H 3.512593 2.831931 0.932268  H 2.056362 3.302106 -0.007128  H 1.955439 2.027973 1.245049 |
| 21 | C 0.768732 2.352012 -1.513766  O -0.602713 1.986833 -1.390387  C -0.882627 1.671491 -0.032754  C 0.486165 1.552691 0.688543  C 1.497920 1.514891 -0.472726  H 1.095144 2.122059 -2.529048  H 0.894172 3.432097 -1.325771  H -1.479994 2.458380 0.432450  H 0.565615 0.661607 1.312174  H 2.474146 1.907902 -0.167683  C -1.217251 -0.707590 -0.437202  C -3.073911 0.602446 0.428208  C -1.986898 -1.825521 -0.456016  H -0.181400 -0.695707 -0.768694  C -3.327190 -1.674803 0.011124  H -1.588698 -2.768489 -0.806086  N -1.718042 0.475930 0.007038  N -3.835766 -0.538510 0.428698  N -4.163832 -2.760469 0.002917  H -5.022817 -2.646835 0.520309  H -3.753712 -3.680229 -0.013960  O -3.502072 1.691231 0.780701  O 0.696790 2.670001 1.537413  H 0.759548 3.469255 1.000847  O 1.627133 0.214700 -1.002106  P 2.795466 -0.798289 -0.383300  O 4.002746 0.013557 -0.033714  O 2.805471 -2.008668 -1.251415  O 1.974653 -1.142573 1.026474  C 2.709607 -1.894855 1.971450  H 3.623363 -1.362552 2.261614  H 2.071862 -2.035728 2.848761  H 2.979644 -2.876654 1.561443 |
| 22 | C -1.273027 1.901809 0.909847  O 0.055475 1.890102 1.482534  C 1.033821 1.833660 0.477549  C 0.311953 2.239802 -0.816483  C -1.091462 1.666434 -0.591544  H -1.879271 1.123888 1.376439  H -1.727631 2.880333 1.112761  H 1.851962 2.519832 0.702301  H 0.796447 1.850702 -1.711637  H -1.851082 2.188549 -1.179471  C 0.962580 -0.612091 0.826610  C 2.898865 0.394480 -0.222460  C 1.510643 -1.848977 0.689196  H -0.019129 -0.460743 1.257769  C 2.791313 -1.906040 0.069451  H 0.970151 -2.731793 1.002403  N 1.630172 0.484899 0.403016  N 3.455743 -0.849684 -0.345219  N 3.410767 -3.124620 -0.083517  H 4.187461 -3.112295 -0.729361  H 2.814422 -3.936524 -0.129962  O 3.428592 1.424332 -0.624164  O 0.278320 3.652527 -0.925997  H -0.102695 4.016343 -0.117190  O -1.050290 0.292579 -0.920342  P -2.450751 -0.585198 -0.741402  O -2.432518 -1.727883 -1.695261  O -3.581941 0.387100 -0.597051  O -2.081148 -1.172583 0.783919  C -2.995649 -2.134850 1.272165  H -3.044558 -2.995998 0.595218  H -2.642456 -2.459193 2.255563  H -3.998907 -1.701296 1.374067 |

Table S2. Values of endocyclic sugar ring torsional angles in DFT-optimized conformers in the gas phase.

|  | B3LYP/6-311++G** | | | | | | |
| --- | --- | --- | --- | --- | --- | --- | --- |
| No | n0 | n1 | n2 | n3 | n4 | *P* (conformation) | n m |
| 1 | -1.0 | -21.4 | 33.8 | -35.7 | 23.5 | 20.5 (3*E*) | 36.0 |
| 2 | -1.0 | -21.0 | 33.2 | -34.9 | 22.9 | 20.4 (3*E*) | 35.4 |
| 3 | -33.1 | 37.5 | -27.5 | 9.3 | 14.7 | 138.1 (2*T*1) | 37.0 |
| 4 | -5.7 | 28.3 | -38.6 | 36.5 | -19.8 | 190.6 (2*T*3/*E*3) | 39.3 |
| 5 | 4.2 | -23.7 | 32.6 | -31.3 | 17.4 | 11.7 (3*E*) | 33.2 |
| 6 | -29.1 | 12.6 | 7.3 | -24.6 | 34.0 | 77.4 (0*T*4) | 33.4 |
| 7 | 3.5 | 20.4 | -34.6 | 38.1 | -26.5 | 204.1 (*E*3) | 37.9 |
| 8 | -12.8 | -8.6 | 25.0 | -33.4 | 29.6 | 41.2 (3*T*4) | 33.2 |
| 9 | 18.1 | 4.7 | -23.7 | 34.5 | -33.4 | 228.1 (4*T*3/4*E*) | 35.4 |
| 10 | -17.3 | 11.0 | -1.1 | -8.9 | 16.6 | 93.5 (0*E*) | 17.5 |
| 11 | -38.9 | 33.5 | -16.1 | -6.1 | 28.2 | 114.9 (0*T*1) | 38.2 |
| 12 | -12.1 | -11.8 | 29.1 | -37.4 | 31.7 | 37.8 (3*T*4) | 36.8 |
| 13 | 8.3 | -27.3 | 34.3 | -30.5 | 14.3 | 4.9 (3*T*2) | 34.5 |
| 14 | -5.6 | -18.1 | 33.0 | -37.6 | 27.6 | 27.4 (3*E*/3*T*4) | 37.2 |
| 15 | 3.4 | 20.5 | -34.8 | 38.2 | -26.5 | 204.0 (*E*3) | 38.1 |
| 16 | 3.4 | 20.6 | -34.9 | 38.3 | -26.6 | 204.0 (*E*3) | 38.2 |
| 17 | -8.2 | -15.6 | 31.6 | -37.7 | 29.4 | 31.5 (3*T*4) | 37.1 |
| 18 | 21.6 | 1.1 | -21.3 | 34.4 | -35.5 | 234.0 (4*E*) | 36.3 |
| 19 | -9.5 | -13.3 | 29.2 | -35.6 | 28.9 | 34.0 (3*T*4) | 35.3 |
| 20 | 1.0 | 23.2 | -36.7 | 38.7 | -25.3 | 200.3 (*E*3) | 39.1 |
| 21 | -7.3 | -15.2 | 30.1 | -35.5 | 27.5 | 30.7 (3*T*4) | 35.0 |
| 22 | -7.2 | -15.2 | 30.0 | -35.2 | 27.3 | 30.6 (3*T*4) | 34.8 |
|  | M062X/6-31+G** | | | | | | |
|  | n0 | n1 | n2 | n3 | n4 | *P* (conformation) | n m |
| 1 | 3.1 | -25.3 | 35.9 | -35.5 | 20.7 | 14.1 (3*E*) | 37.0 |
| 2 | -1.3 | -22.4 | 35.5 | -37.6 | 24.8 | 20.7 (3*E*) | 38.0 |
| 3 | -40.5 | 34.0 | -15.4 | -7.8 | 30.3 | 112.8 (0*T*1) | 39.7 |
| 4 | 19.4 | 6.2 | -27.1 | 39.3 | -37.3 | 227.1 (4*T*3/4*E*) | 39.8 |
| 5 | 4.3 | -25.5 | 35.2 | -34.0 | 19.0 | 12.1 (3*E*) | 36.0 |
| 6 | -29.6 | 9.5 | 12.3 | -30.2 | 37.9 | 70.5 (0*T*4) | 36.9 |
| 7 | 3.3 | 21.3 | -35.6 | 39.3 | -27.1 | 203.9 (*E*3) | 38.9 |
| 8 | -21.0 | -2.2 | 22.5 | -35.9 | 36.4 | 52.8 (*E*4) | 37.2 |
| 9 | 21.4 | 4.5 | -26.2 | 39.0 | -38.2 | 229.4 (4*T*3/4*E*) | 40.3 |
| 10 | -4.9 | 4.9 | -3.0 | 0.4 | 2.8 | 127.6 (*E*1) | 5.0 |
| 11 | -22.2 | 1.9 | 17.2 | -31.0 | 34.0 | 59.3 (*E*4) | 33.7 |
| 12 | 0.2 | -24.5 | 37.5 | -39.0 | 24.9 | 18.8 (3*E*) | 39.6 |
| 13 | 17.0 | -33.9 | 36.6 | -27.7 | 7.1 | 351.9 (*E*2/3*T*2) | 37.0 |
| 14 | 3.0 | -26.9 | 38.7 | -38.5 | 22.8 | 14.8 (3*E*) | 40.1 |
| 15 | 4.0 | 20.8 | -35.6 | 39.7 | -27.8 | 204.8 (*E*3) | 39.3 |
| 16 | 3.0 | 22.0 | -36.4 | 39.8 | -27.2 | 203.2 (*E*3) | 39.6 |
| 17 | -4.2 | -21.4 | 36.8 | -40.7 | 28.6 | 24.7 (3*E*) | 40.5 |
| 18 | 25.1 | 0.8 | -23.8 | 39.0 | -40.5 | 234.8 (4*E*) | 41.3 |
| 19 | 9.5 | -30.0 | 37.5 | -33.1 | 15.3 | 4.4 (3*T*2) | 37.6 |
| 20 | 2.4 | 22.3 | -36. | 39.3 | -26.7 | 202.5 (*E*3) | 39.3 |
| 21 | -12.3 | -12.5 | 30.2 | -38.7 | 32.7 | 37.5 (3*T*4) | 38.1 |
